# Supplementary material
Source: PubMed Central journal article supplement (PMC4213165)
Supplement: supp_tpc.114.130120_tpc130120_Supplemental2.pdf [file supp_tpc.114.130120_tpc130120_Supplemental2.pdf]

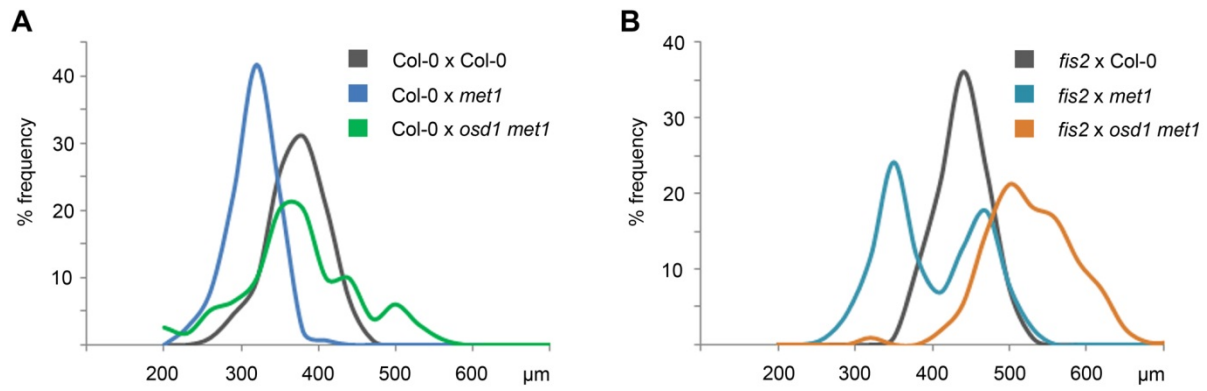

**Supplemental Figure 1.** Analysis of Seed Size from Indicated Crosses. Seed size was determined by measuring seed length using ImageJ for (A) Col x Col (n=283), Col x *met1* (n=151) and Col x *osd1 met1* (n=232) and (B) *fis2* x Col (n=108; this cross results in 50% seed abortion but only WT-like seeds were measured), *fis2* x *met1* (n=232) and *fis2* x *osd1 met1* (n=330).

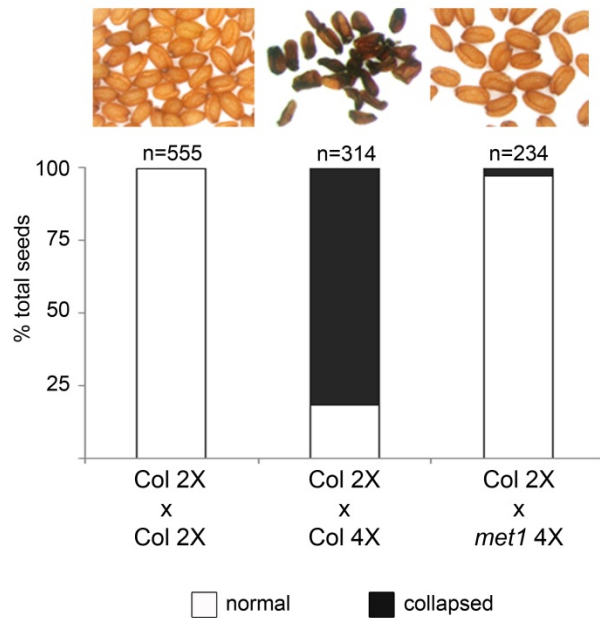

**Supplemental Figure 2.** Tetraploid *met1* can Bypass the Triploid Block. Percentage of collapsed seeds in Col 2X x Col 2X, Col 2X x Col 4X and Col 2X x *met1* 4X. Pictures of mature seeds correspond to genotypes displayed in bars below. n, numbers of total seeds analyzed.

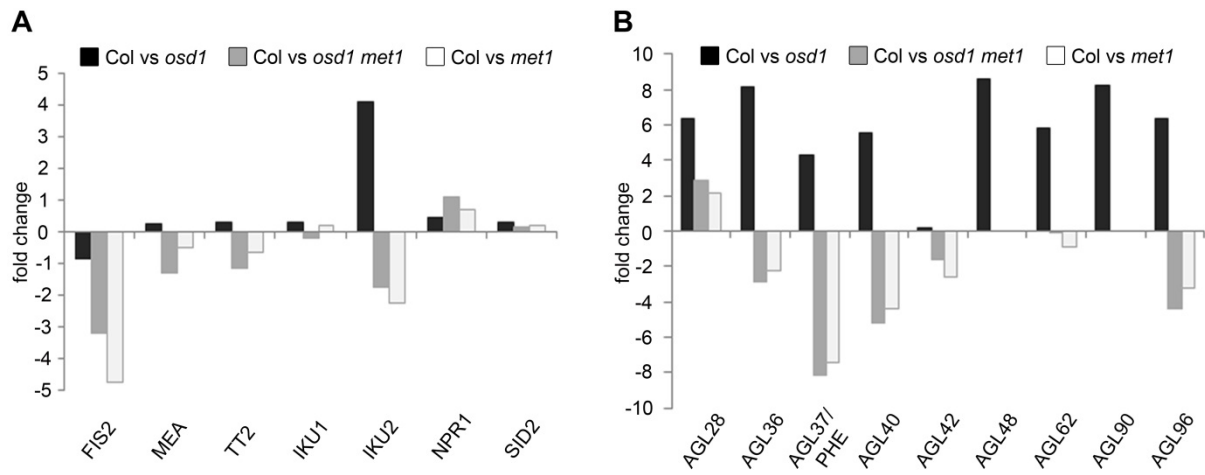

**Supplemental Figure 3.** Fold Change Expression of Selected Genes in Triploid Seeds and Hypomethylated Diploid and Triploid Seeds. *Ler* x *Col* versus *Ler* x *osd1* (black bars), *Ler* x *Col* versus *Ler* x *osd1 met1* (gray bars), *Ler* x *Col* vs *Ler* x *met1* (white bars). Data were taken from whole genome transcriptome analysis (Supplemental Dataset 1).

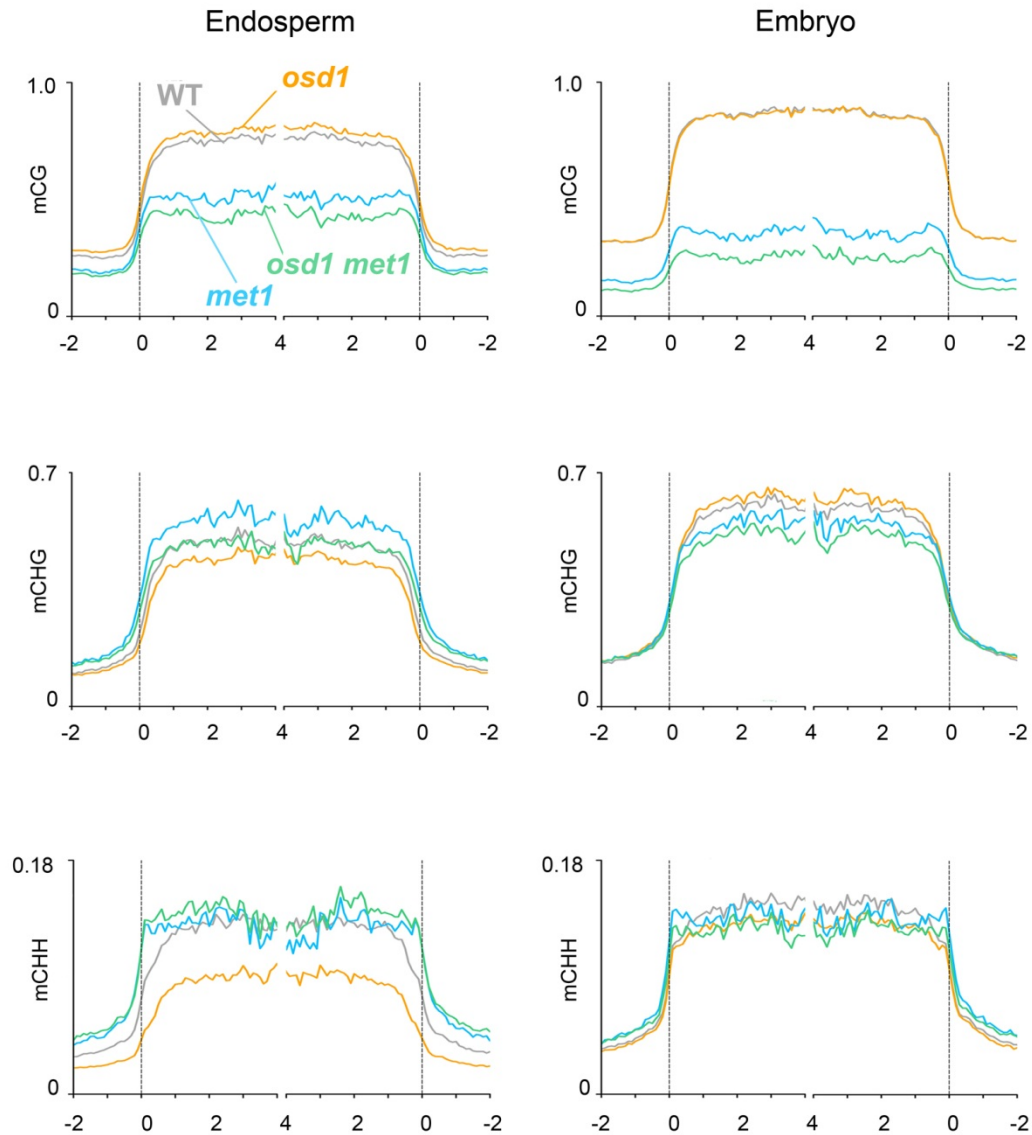

**Supplemental Figure 4.** Methylation Profiles of Transposable Elements (TEs) in the Embryo and Endosperm after Pollination with Hypomethylated Pollen. The profiles are derived from seeds of the following crosses: *Ler* x *Col*, *Ler* x *osd1*, *Ler* x *osd1 met1*, and *Ler* x *met1*. TEs were aligned at the 5' and 3' ends (dashed lines) and average methylation levels in CG (top panels), CHG (middle panels) and CHH context (bottom panels) for each 100-bp interval were plotted.

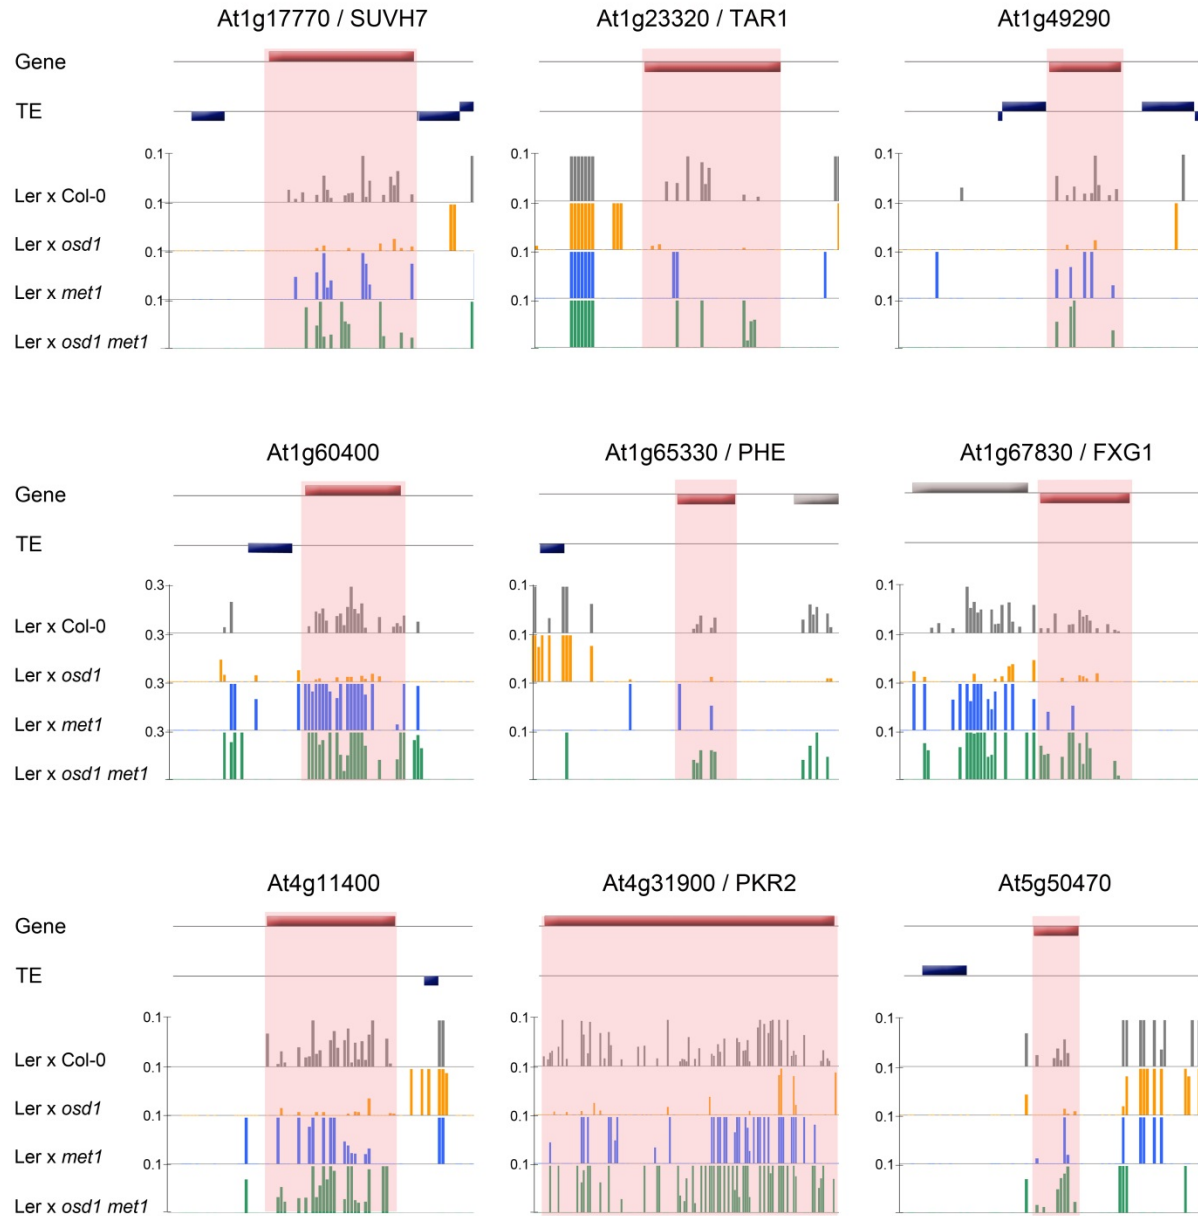

**Supplemental Figure 5.** CHG Methylation Profiles of PEGs in the Endosperm. The profiles are derived from seeds of the following crosses: *Ler* x *Col* (gray), *Ler* x *osd1* (orange), *Ler* x *met1* (blue) and *Ler* x *osd1 met1* (green). Red bars, gray bars and blue bars correspond to genes of interest, flanking genes and transposable elements, respectively. Sense and antisense oriented genes and transposable elements are on top or below the line, respectively. For simplicity, exon-intron structure is not shown.

**Supplemental Table 1.** Median Coverage per Cytosine and Mean DNA Methylation for Samples Analyzed in this Study. Chloroplast CHH methylation is a measure of cytosine non-conversion and other errors. M/P = Maternal to Paternal ratio. NA= not applicable. C<sup>m</sup>=methylated cytosine.

| Sample                                  | Median Coverage | Nuclear C <sup>m</sup> G (%) | Nuclear C <sup>m</sup> HG (%) | Nuclear C <sup>m</sup> HH (%) | Chloroplast C <sup>m</sup> HH (%) | M/P ratio | Expect. M/P ratio | Seed coat (%) |
|-----------------------------------------|-----------------|------------------------------|-------------------------------|-------------------------------|-----------------------------------|-----------|-------------------|---------------|
| <i>Ler</i> x <i>Col</i> endosperm       | 20              | 22                           | 8.19                          | 2.51                          | 0.04                              | 1.94      | 2                 | 0             |
| <i>Ler</i> x <i>Col</i> embryo          | 29              | 24.88                        | 9.83                          | 2.9                           | 0.04                              | 0.83      | 1                 | NA            |
| <i>Ler</i> x <i>osd1</i> endosperm      | 39              | 21.41                        | 6.89                          | 1.55                          | 0.04                              | 1.22      | 1                 | 10            |
| <i>Ler</i> x <i>osd1</i> embryo         | 36              | 25.51                        | 10.71                         | 2.73                          | 0.04                              | 0.66      | 0.5               | NA            |
| <i>Ler</i> x <i>osd1 met1</i> endosperm | 8               | 17.92                        | 11.45                         | 3.89                          | 0.11                              | 1.93      | 1                 | 32            |
| <i>Ler</i> x <i>osd1 met1</i> embryo    | 12              | 9.78                         | 10.95                         | 3.48                          | 0.11                              | 0.57      | 0.5               | NA            |
| <i>Ler</i> x <i>Col met1</i> endosperm  | 6               | 16.98                        | 10.7                          | 3.34                          | 0.11                              | 2.42      | 2                 | 12            |
| <i>Ler</i> x <i>met1</i> embryo         | 8               | 12.31                        | 10.1                          | 3.4                           | 0.11                              | 0.96      | 1                 | NA            |
| <i>jason</i> sperm cells 1n             | 10              | 34.06                        | 14.68                         | 1.71                          | 0.41                              | NA        | -                 | NA            |
| <i>jason</i> sperm cells 2n             | 8               | 33.1                         | 13.7                          | 1.56                          | 0.13                              | NA        | -                 | NA            |

**Supplemental Table 2.** List of Primers Used in Quantitative RT-PCR.

| Gene            | Primer sequence                                       |
|-----------------|-------------------------------------------------------|
| At1g11810       | CAACAAGGTGTCGTGGAGAG<br>CCAACCTCTGTCTCTTGACCG         |
| At1g17770       | CGTAAACCATTGATTTACGAGTGC<br>CCACAGTTTCTGTCTTGAACAC    |
| At1g34650       | GGTCGTTCTAAGGTAACATGGA<br>TCCTCTGAAGAGTAGCGGTC        |
| At1g48910       | TTGATCTTTGCAACTTCGGA<br>CCATAGTCGTCACCAATGTG          |
| At1g49290       | GGAAGTGATAGAAGCGGTAGAG<br>TAAACCTCGCACTACAATCTC       |
| At1g60400       | CGAACGTTAGAGGTCATCCG<br>GCAACAACCAAGAAAGACTGG         |
| At1g66630       | CATGGAGAATGTTGGAGGAACG<br>ATTGTCACACTGATAGATAGGAGC    |
| At1g67830       | CTTCATAGCGGAGAGTCTTGG<br>TTGACGTAGAGTAGAGTTAAGAGC     |
| At2g36560       | GATATCTGAGAGCGGAGGAG<br>AATCACAACCTGGACTGGAC          |
| At3g49770       | GAGCCTGGTCATCAACTAAACC<br>TAGAAGATCAGCACAGGAACG       |
| At3g50720       | TTTGTGAACCAAGGGCAAGAG<br>ATTTCGAGACGAGTCTTTGAGTC      |
| At3g62230       | TTAAGAAAGTGGAGGTGTGGAG<br>ATCGGAAGCAGTTGAATATCATCC    |
| At4g05470       | TTACCGATAGGAATCTGAGAAGTC<br>TTTATACATGAGTGAGTGACCTCG  |
| At4g10160       | CGTCTGTGTGCCAATCTGTGTCAT<br>GCTCAGTCCTAATTCAGCCGTTGAG |
| At4g11940 (ADM) | TTGAAAGAGTTTGCGGATGTG<br>AGGACCAACATTATGGTCATACC      |
| At4g31900       | ATGCTGATAGAACAAGTCACTGG<br>CATACATCACCTGCTTGCCG       |
| At5g15140       | GCTCAAGAAGGGAAATCTAACTG<br>AAACCTTGTCGGTCTTGAGG       |
| At5g54350       | CGCCTTTCCAAAGCTTTCCA<br>CAAGAAGATGGACCAAGAGTGAG       |
| Actin11         | AACTTTCAACTCCTGCCATG<br>CTGCAAGGTCCAAACGCAGA          |
| PHE1            | TCCAACCCGAAAACCTCCAT<br>CGCATGTGCGGTCATCC             |

## Supplemental Methods

### Generation of Tetraploid *met1-9*

Tetraploid *met1-9* lines were generated by treating two-week old seedlings with 6  $\mu$ l of either 0.125% or 0.25% colchicine (Sigma, Buchs, Switzerland). Treated plants were grown to maturity and scored for phenotypic alterations of flower and seed size. Seeds were harvested from plants showing enlarged flowers and increased seed size compared to wild type. Ploidy and karyotypes of putative tetraploid lines was confirmed as previously described (Bailey and Stace, 1992).

### Supplemental References:

**Bailey, J.P., and Stace, C.A.** (1992). Chromosome-number, morphology, pairing, and DNA values of species and hybrids in the genus *Fallopia* (Polygonaceae). *Plant Syst. Evol.* **180**, 29-52.
